# Supplementary material
Source: PubMed Central journal article supplement (PMC7832202)

# THE LANCET

## Supplementary appendix

This appendix formed part of the original submission. We post it as supplied by the authors.

Supplement to: Menni C, Sudre CH, Steves CJ, Ourselin S, Spector TD. Widespread smell testing for COVID-19 has limited application—Authors' reply. *Lancet* 2020; published online Nov 3. [http://dx.doi.org/10.1016/S0140-6736\(20\)32316-3](http://dx.doi.org/10.1016/S0140-6736(20)32316-3).

**Figure 1.** Association between symptoms (fever, persistent cough, loss of smell) and COVID-19 infection in 155,217 app users, healthy at the time of sign-up, and tested for SARS-CoV-2 after registration on the app with onset of symptoms in a [-14 days / +5] days window). OR(95%CI) are reported in the overall group and stratifying by age groups.

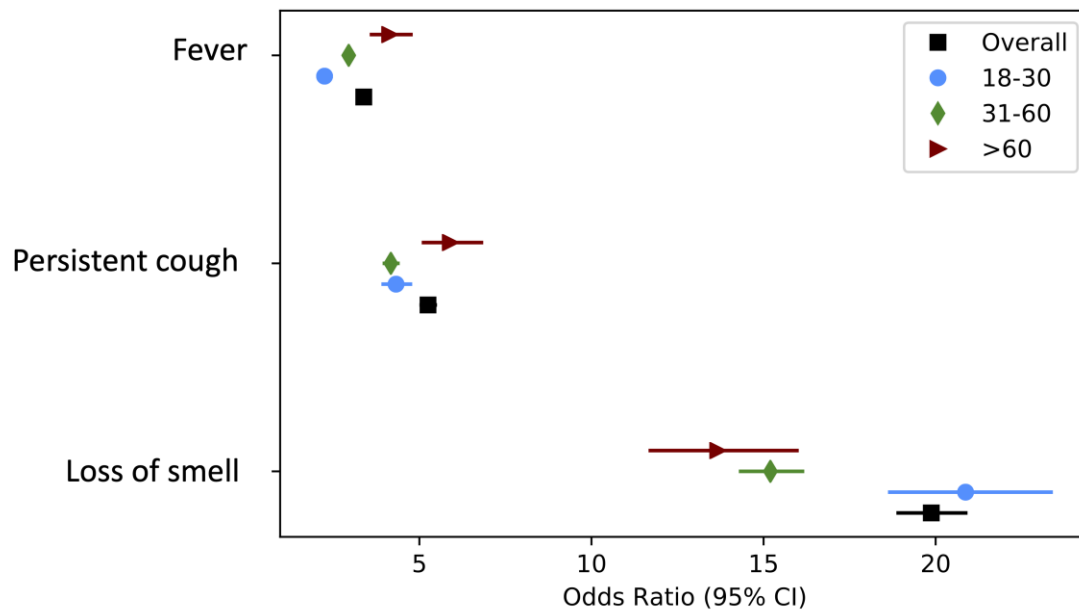

Supplement: mmc1.pdf [file mmc1.pdf]
